## RESEARCH ARTICLE

# Root biomass and root morphological traits of three shrub species: Implications for the soil anti-scouring resistance of the ecological slope

Mingxin Zhou<sup>1,2,3</sup>, Guoyong Yan<sup>4\*</sup>, Yibo Li<sup>2,5</sup>, Di Chen<sup>1</sup>, Chao Yan<sup>1</sup>, Nan Wang<sup>3</sup>, Chao Jia<sup>3</sup>, Qinggui Wang<sup>4</sup>, Yajuan Xing<sup>4</sup>

**1** Heilongjiang Academy of Forestry, Harbin, China, **2** Northeast Forestry University, Harbin, China, **3** Heilongjiang Institute of Construction Technology, Harbin, China, **4** School of Life Sciences, Qufu Normal University, Qufu, China, **5** Heilongjiang Polytechnic, Harbin, China

\* [guoyongyan1991@163.com](mailto:guoyongyan1991@163.com)

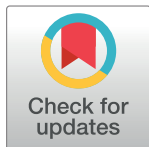

## Abstract

The purpose of this study was to determine which shrub species will enhance soil anti-scouring resistance on an ecological slope. Root traits and soil anti-scouring resistance of three shrubs (*Amorpha fruticosa* Linn (AFL), *Swida alba* Opiz (SAO) and *Lespedeza bicolor* Turcz (LBT)) were measured. Results showed that root biomass and root morphological traits of three shrubs were significantly correlated with the soil anti-scouring resistance index. According to the composition characteristic values, root morphological traits among the three shrubs had a high contribution rate. Under two slopes and two rainfall conditions, when root biomass and root morphological traits (e.g., root length, root volume and root surface area) were identical, AFL had the highest soil anti-scouring resistance index. These results suggested that root biomass and morphological traits of AFL had more significant effects on soil anti-scouring resistance comparing with SAO and LBT. Therefore, in engineering practice, AFL with stronger soil anti-scouring resistance can be selected as slope plants.

## OPEN ACCESS

**Citation:** Zhou M, Yan G, Li Y, Chen D, Yan C, Wang N, et al. (2023) Root biomass and root morphological traits of three shrub species: Implications for the soil anti-scouring resistance of the ecological slope. *PLoS ONE* 18(11): e0288848. <https://doi.org/10.1371/journal.pone.0288848>

**Editor:** Ji-Zhong Wan, Qinghai University, CHINA

**Received:** November 6, 2022

**Accepted:** July 5, 2023

**Published:** November 16, 2023

**Copyright:** © 2023 Zhou et al. This is an open access article distributed under the terms of the [Creative Commons Attribution License](https://creativecommons.org/licenses/by/4.0/), which permits unrestricted use, distribution, and reproduction in any medium, provided the original author and source are credited.

**Data Availability Statement:** All relevant data are within the paper and its [Supporting Information](#) files.

**Funding:** This research was supported by grants from the National Natural Science Foundation of China (42230703, 41773075).

**Competing interests:** The authors declare no competing interests.

## 1. Introduction

Rainfall is one of the main reasons for the instability of expressway ecological slope [1]. This instability is caused by the erosion power of the rain [2]. For expressway slopes, shallow landslide caused by rainfall is one of the most common geological disasters [3]. Practice shows that, expressway slopes under conditions of continuous rainfall, surface soil is subject to erosion by runoff and rainfall. The instability of expressway ecological slope has adverse effects on driving safety [4].

Previous studies found that vegetation cover was very important for controlling erosion [5–7]. Ecological slope protection technology is used to improve slope stability and prevent shallow landslide [8]. People pay more attention to ecological slope protection technology, aiming

to stabilize the shallow slope, reduce the risk of shallow landslide caused by rainfall, and improve the ecological environment [9, 10]. The reasons of expressway ecological slope instability caused by rainfall are complicated [11].

Previous studies found that root biomass and root morphological characteristics played an important role in the enhancement effect of soil anti-scouring resistance [12]. The effect of the root system in enhancing soil anti-scouring resistance was weakened with increasing rainfall intensity [13]. Vegetation plays a very important role in soil erosion control and is the most effective and fundamental method in soil and water conservation [14]. The enhancement of soil anti-scouring resistance mainly depends on the winding, consolidation and serial soil action of roots, this effect makes the soil have a high-water stability structure and impulse resistance strength, which is not easy to be taken away by runoff [15]. Some studies have been conducted on the role of plant roots on soil retention, but traditional studies have focused on the effects of aboveground biomass, but less attention is paid to the role of underground biomass [16]. More studies are needed to verify the effects of root morphological characteristics on soil anti-scouring resistance.

Root anti-scouring resistance is a macroscopic manifestation of shrub roots in its mechanical properties. However, the root morphological characteristics are the intrinsic nature of the root generation of a macroscopic phenomenon. Studying root morphological characteristics can help to explain the mechanical properties from the perspective of shrub roots, and reveal the mechanism.

We set out to fill in the knowledge gaps by determining the following: the dominant shrubs can be beneficial to the slope protection by comparing the soil anti-scouring resistance index under two rainfalls conditions with slopes of both 30° and 60°. In addition, by studying the relationship between root morphological characteristics and mechanical indicators, revealed the internal mechanism affecting soil anti-scouring resistance. Finally, through the principal component analysis, we determined the root morphological characteristics affecting the mechanical indicators.

In this study, three typical types of shrubs in the northeast were selected by field investigation. The three shrub species are *Amorpha fruticosa* Linn. (AFL); *Lespedeza bicolor* Turcz (LBT); *Swida alba* Opiz (SAO). We assumed that mechanical reinforcement of root traits in different response directions would differ based on species traits. The results of this study provide planting plant options for preventing rain erosion on road slopes.

## 2. Materials and methods

### 2.1. Study sites expressway introduction

Hatong Expressway starts in Harbin and ends in Tongjiang. The traffic mileage is 595 km. The Hatong Expressway was built in 1997. This expressway was extended in 2005, and its slopes were planted with shrubs to increase slope stability. This expressway is located on the south of the Songhua River, and on the northwest of the Zhangguangcai Ridge that the branch of Changbai Mountain. The line position area is mostly mountainous and hilly. The belt along the expressway is mostly hilly, undulating terrain. On the Hatong Expressway, which connects Harbin to Jiamusi in northeastern China, a site test was conducted. In this study area, the winters are longer, the summers are shorter, the winters are cold, and the summers are warm. This is typical of a temperate continental monsoon climate. The average annual rainfall at the study site is about 300 mm to 700 mm. Rainfall is more concentrated, the rainfall time is generally concentrated in July-September, accounting for more than 60% -70% of the annual rainfall. There are a number of challenges associated with this type of rainfall in the study area. The study area map is shown in S1 Fig in [S1 File](#).

Table 1. Characteristics of important shrub species in the study area.

| Species | Mean height/cm | Mean coverage/% | canopy/cm    | basal diameter/cm | Root biomass g/plant |
|---------|----------------|-----------------|--------------|-------------------|----------------------|
| AFL     | 178.28±3.76    | 96.5±1.02       | 135.67±9.66  | 1.87±0.12         | 40.07±0.34           |
| LBT     | 221.15±5.66    | 92.4±0.99       | 153.66±11.23 | 2.25±0.07         | 42.98±0.84           |
| SAO     | 211.45±2.66    | 92.7±1.42       | 166.29±10.57 | 1.92±0.09         | 49.71±0.56           |

<https://doi.org/10.1371/journal.pone.0288848.t001>

## 2.2. Experimental design and sampling

At the aspect of selection with tree species, the research followed the principles of common, suitable and engineering precedent. After field investigation and reference, the species of study to be determined were: *Amorpha fruticosa* Linn (AFL), *Swida alba* Opiz (SAO) and *Lespedeza bicolor* Turcz (LBT). In this experiment, we collected shrubs from the same slope of site conditions. The main shrub characteristics of the study plots are as follows (Table 1).

In early June 2020, we selected three years shrub which were cut by the slope of Harbin-Jiamusi section, and potted them. The containers were selected with 50 cm × 30 cm plastic flowerpots. The soil used for planting was the base soil of the cutting slope of Harbin-Jiamusi section of Hatong Expressway. The potted shrubs were 50 flowerpots for each type, and planted one shrub in each flowerpot. During the cultivation period, we performed routine management. In early September 2021, we performed the soil anti-scouring resistance test. After the soil anti-scouring resistance test, plants were removed from the flowerpots to measure shrub root biomass and morphological traits. The final conclusion was drawn using the experimental data and statistical analysis. S2 Fig in S1 File shows the flowchart of the methodology.

**2.2.1. Soil anti-scouring resistance index.** Soil anti-scouring resistance refers to the mechanical damage and traffic capacity of the soil to the water flow, which is mainly related to the soil physical properties and external biological factors [17]. The experiments performed in this study were modified from the original soil scour pool (S3 and S4 Figs in S1 File). In order not to destroy the soil structure, we made a 20cm × 18cm × 10cm sampler, the slope of the resistant tank was designed to be 30° and 60°. According to the average value of the potential runoff velocity (2mm/min) caused by the typical moderate storm in the study area, the simulated runoff flux was designed. Adjust the outlet flow rate and set the outlet flow rate to 2L/min and 0.5L/min respectively. The outlet flow rate was set at 2L/min and 0.5L/min to simulate the precipitation of heavy rain and light rain in the study area. During the scouring process, the maximum scouring duration was 10min. The scouring duration was set as 10min, which was the average rainstorm time in the study area. If the scouring was completed within 10 minutes, recorded the time when the scouring was completed. Before the experiment, we cut the ground part of the shrub and cut the flowerpots. We performed three replicate experiments for each condition. This paper used the water quantity Q required to wash away 1 g of soil with a certain water flow rate to indicate the soil anti-scouring resistance. The more water required for scouring 1g soil, the stronger the anti-scouring ability of the root-soil complex. On the contrary, if the less water required for scouring 1g soil, the weaker the anti-scouring ability of the root-soil complex. Therefore, the amount of water required to scour 1g soil with a certain water flow can be used as an important indicator to measure the anti-scouring ability of the root-soil complex. The specific operation steps of soil anti-scouring resistance index determination were as follows (S4 Fig in S1 File): (1) Before the scouring test, we putted the potted plants on the water surface and let the soil absorb water to saturation; (2) After taking out the potted plants, first stand and remove the gravity water until no obvious water drops flow out to obtain the same soil moisture content; (3) Cut the plastic flowerpot, cut off the

aboveground part of the plant, we used the soil sampler to take out the soil block with complete plant roots, and put the soil block with complete plant roots together with the soil sampler into the washing tank for washing; (4) then, we collected and recorded the amount of soil scoured in unit time, dry at 105°C, and weigh, and recorded it as  $\Delta W$  (mass of soil washed away during scouring). The formula was as follows:  $C_s = Q / \Delta W$ . In formula:  $C_s$ - Soil anti-scouring resistance index (L/g);  $Q$ - Water quantity used for scouring (L) (Constant outlet flow rate);  $\Delta W$ - Soil quality which washed away (g).

**2.2.2. Root biomass and root morphological traits.** After the soil anti-scouring resistance test, we measured the root biomass (RB). The plants were removed from the flowerpots, and washed the roots with deionized water. Placed to dry in the laboratory, and separated the above-ground and the under-ground parts. Placed the under-ground parts into a brown paper envelope, put it in the oven with a constant temperature of 80°C, and dried to constant quality. We measured the biomass of the underground part at this time. According to the indoor variable-head permeability test method, the permeability test was carried out on the soil samples containing roots under various root biomass in the mixed rooting state. The water content in the test was set at 25%, the root diameter was 0.5–1.5mm, and the void ratio was 0.99. The permeability coefficient of the soil containing roots under different root biomass was obtained.

And then, we measured the root morphological traits. The residual soil particles of the roots were carefully washed in deionized water with forceps in the laboratory. We selected live roots by identifying the color, elasticity, structure, and texture of the test shrub roots. Root samples for morphological analysis were carefully dissected with forceps by branch order, following the root architecture work of Fitter [18]. The roots of each shrub were scanned by a scanner (Expression 11000XL) with a resolution of 600 dpi. We measured the total root surface area (TRSA), total root volume (TRV), and total root length (TRL) by WinRHIZO-TronMF 2012 software (root system analysis software).

### 3. Statistical analyses

Regression analysis was used to investigate the relationship between soil anti-scouring resistance index ( $C_s$ ) and root biomass (RB), total root surface area (TRSA), total root volume (TRV), and total root length (TRL) at different slopes. The above data analysis was done through the ggplot2 package of the R. The difference in soil anti-scouring resistance index between different shrub species was investigated by using the Tukey-Kramer-HSD one-way analysis of variance (ANOVA) method. The effects of the interaction between different plants, slopes, and different parameters were evaluated by multiway ANOVA. Principal component analysis was used to analyze the main factors affecting soil anti-scouring resistance index. All data analysis was performed using the SPSS software version 22.0. All figures were conducted using SigmaPlot 12.5.

## 4. Results

### 4.1. Soil anti-scouring resistance index

The roots of all 3 shrubs showed strong soil anti-scouring resistance under two rainfalls conditions with slopes of both 30° and 60° (Fig 4). Under heavy rain, the soil anti-scouring resistance index of SAO was significantly higher than that of AFL and LBT with slopes of both 30° and 60° (Fig 1). Under light rain, the soil anti-scouring resistance index of SAO was significantly higher than that of AFL and LBT, and AFL was significantly higher than LBT with slopes of both 30° and 60° (Fig 1). In addition, for the same shrub, with increasing slope, the soil anti-scouring resistance index decreased. There was a significant negative correlation between soil anti-scouring resistance index and slope (Fig 1). Moreover, plant type, slope, and their interaction had significant effects on all soil anti-scouring resistance index for all slopes (Fig 1).

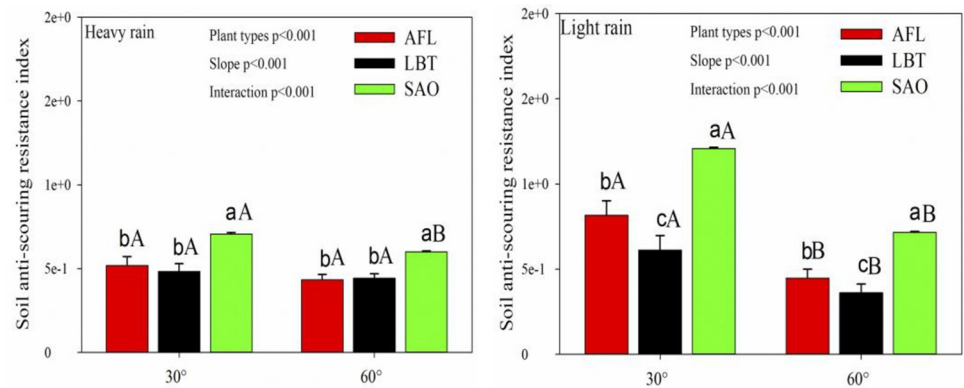

**Fig 1. Soil anti-scouring resistance index at different slopes and different rainfall among three plant types (mean ± SE).** Different lowercase letters represent statistical significances in different plant types for same soil slope; different capital letters represent statistical significances in same plant type for different soil slopes. AFL, *Amorpha fruticosa* Linn.; LBT, *Lespedeza bicolor* Turcz.; SAO, *Swida alba* Opiz.

<https://doi.org/10.1371/journal.pone.0288848.g001>

#### 4.2. Effects of root properties on soil anti-scouring resistance index

There was a positive relationship between soil anti-scouring resistance index and root biomass in all three shrubs under two rainfalls conditions with slopes of both 30° and 60° (Fig 2). Under heavy and light rain, when the shrub root biomass was the same, AFL had the highest soil anti-scouring resistance index, followed by SAO, and LBT with slopes of both 30° and 60° (Fig 2). Moreover, plant type, root biomass, and their interaction had significant effects on all soil anti-scouring resistance index for all slopes (Fig 2). When the root biomass in the soil was less than 25%, the permeability coefficient of the soil with roots increased with the increase of the root biomass, showing a positive correlation (S1 Table in S1 File). The permeability coefficient of soil with roots reached a peak when the root biomass reached 25%. When the root biomass in the soil was higher than 25%, the permeability coefficient of the soil with roots decreased with the increase of the root biomass, showing a negative correlation.

There was a positive relationship between soil anti-scouring resistance index and total root length in all three shrubs under two rainfalls conditions with slopes of both 30° and 60° (Fig 3). Under heavy and light rain, when the shrub total root length was the same, AFL had the highest soil anti-scouring resistance index, followed by SAO, and LBT with slopes of both 30° and 60° (Fig 3). Moreover, plant type, total root length, and their interaction had significant effects on all soil anti-scouring resistance index for all slopes (Fig 3).

There was a positive relationship between soil anti-scouring resistance index and total root volume in all three shrubs under two rainfalls conditions with slopes of both 30° and 60° (Fig 4). Under heavy and light rain, when the shrub total root volume was the same, AFL had the highest soil anti-scouring resistance index, followed by SAO, and LBT with slopes of both 30° and 60° (Fig 4). Moreover, plant type, total root volume, and their interaction had significant effects on all soil anti-scouring resistance index for all slopes (Fig 4).

There was a positive relationship between soil anti-scouring resistance index and total root surface area in all three shrubs under two rainfalls conditions with slopes of both 30° and 60° (Fig 5). Under heavy and light rain, when the shrub total root surface area was the same, AFL had the highest soil anti-scouring resistance index, followed by SAO, and LBT with slopes of both 30° and 60° (Fig 5). Moreover, plant type, total root surface area, and their interaction had significant effects on all soil anti-scouring resistance index for all slopes (Fig 5).

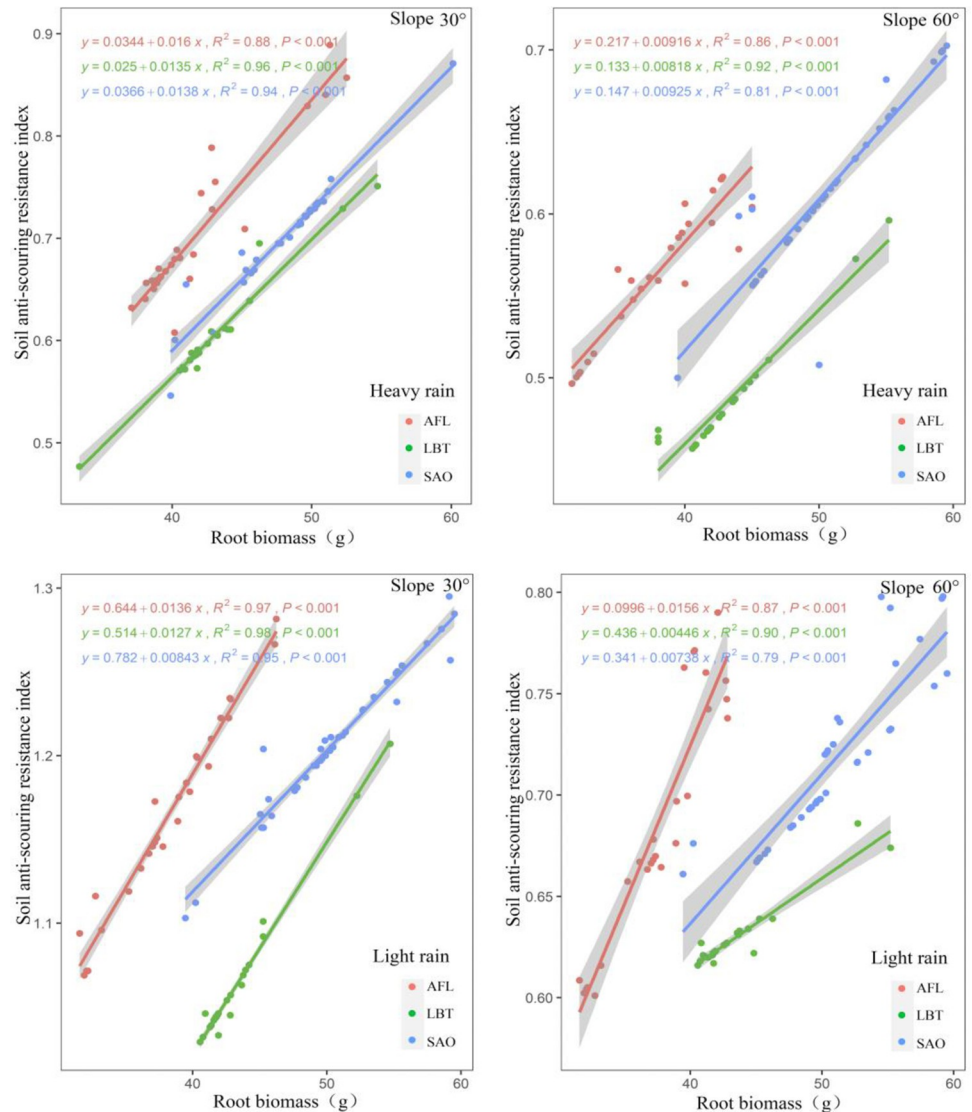

**Fig 2. Under heavy and light rain, relationship between soil anti-scouring resistance index and root biomass at different slopes for three shrub species.**

<https://doi.org/10.1371/journal.pone.0288848.g002>

### 4.3. Analysis of the main factors affecting the soil anti-scouring resistance index

To study the effect of shrub roots on soil anti-scouring resistance, PCA was used to select for key factors, which were ranked by the size of the factor characteristic value. The first principal component had a high factor load with the TRL, TRV, and TRSA, which was called the root morphology factor. The second principal component had a higher factor load with the root biomass, called the biomass factor (Tables 2–5). According to the component characteristic value and contribution rate, the shrub root morphological factor explained 91.238% (Table 2), 94.078% (Table 3), 91.725% (Table 4), and 76.742% (Table 5). Under heavy and light rain, root morphological factors played a relatively greater role on soil anti-scouring resistance characteristics with slopes of both 30° and 60°.

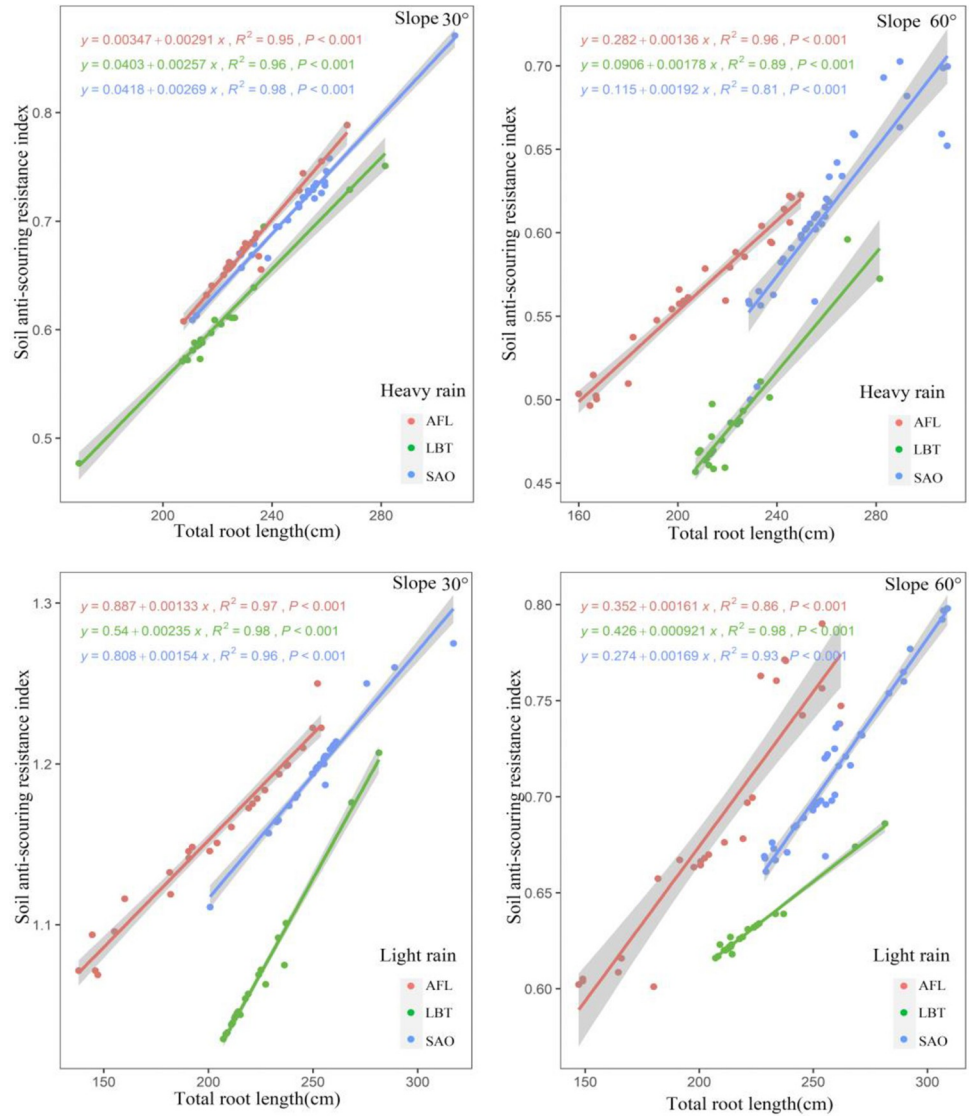

**Fig 3.** Under heavy and light rain, relationship between soil anti-scouring resistance index and total root length at different slopes for three shrub species.

<https://doi.org/10.1371/journal.pone.0288848.g003>

## 5. Discussion

Different shrub roots play different reinforcement roles in improving the stability of ecological slope [19]. Under the same conditions, if the shrub can improve the soil scour resistance, then the slope damage rate will be reduced [20]. In this study, shrubs, better adapted to improve the structural stability of the slope, can be obtained by comparing the relationship between root morphological characteristics and soil anti-scouring resistance of AFL, SOL and LBT under different rainfalls and different slopes.

### 5.1. Compartmented soil anti-scouring resistance index in different shrubs

In this study, under the two conditions of light rain and heavy rain, the soil anti-scouring resistance index of SAO was significantly higher than that of AFL and LBT with slopes of both 30° and 60°. This suggested that plant species played an important role in explaining soil anti-

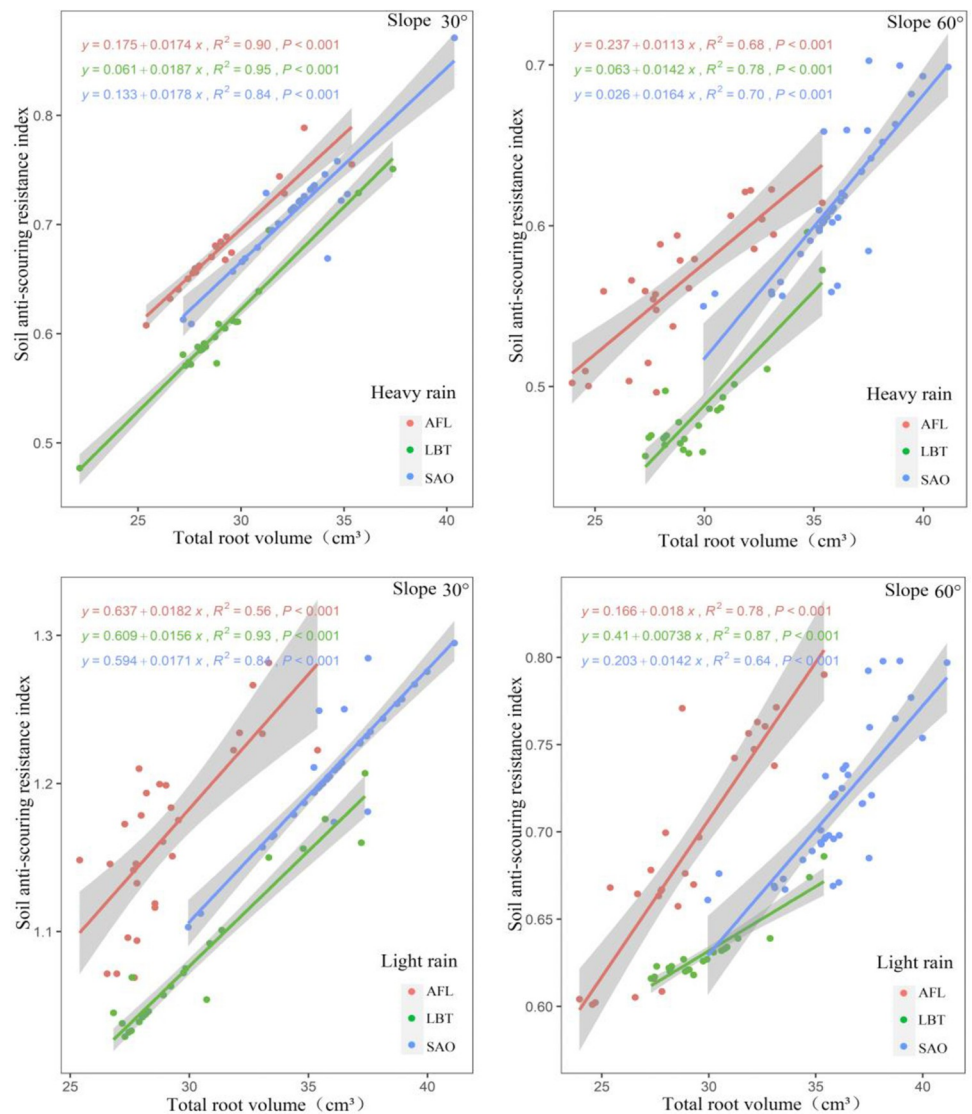

**Fig 4.** Under heavy and light rain, relationship between soil anti-scouring resistance index and total root volume at different slopes for three shrub species.

<https://doi.org/10.1371/journal.pone.0288848.g004>

scouring resistance. Previous studies found that there was a linear positive proportional relationship between the increase of the soil anti-scouring resistance and root biomass [21]. At the same time, roots can directly change the soil pore structure, helping to form a large connected network, promote free water to quickly enter and cross the soil profile, reduce the water pressure in the soil, and improve the soil anti-scouring resistance [22, 23]. Since the individual root biomass of the SAO was large, this resulted in greater root-soil contact area than the other two shrubs [24]. Therefore, the soil anti-scouring resistance index of SAO was larger than that of the other two shrubs studied.

In this study, the soil anti-scouring resistance index decreased significantly with increasing slope when the plant species were the same. Plant type, slope, and its interaction had significant effects on all soil anti-scouring resistance index for all slopes. This suggested that the slope can significantly affect the soil anti-scouring resistance. This was consistent with previous studies [25, 26]. Ziadat and Taimeh (2013) found that, the soil anti-scouring resistance of



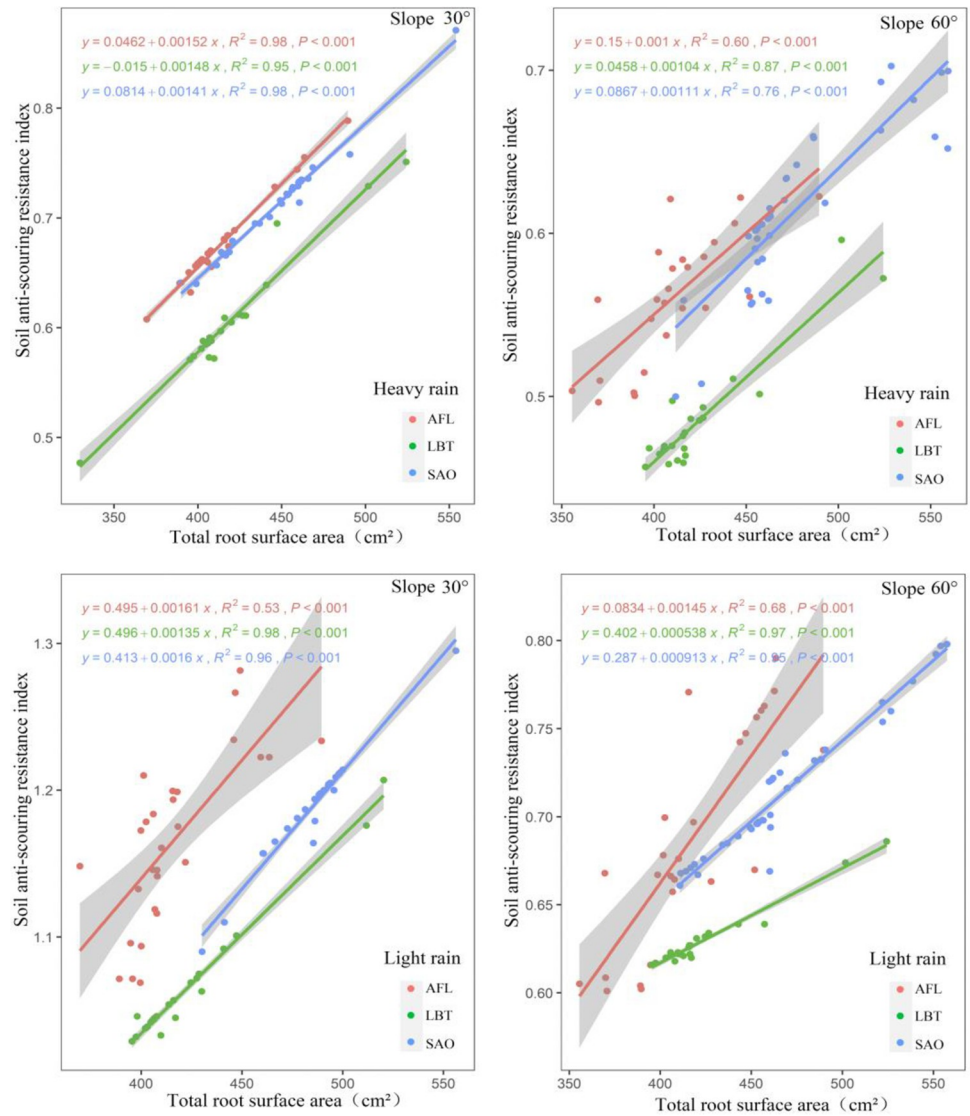

**Fig 5.** Under heavy and light rain, relationship between soil anti-scouring resistance index and total root surface area at different slopes for three shrub species.

<https://doi.org/10.1371/journal.pone.0288848.g005>

**Table 2.** Principal component rotation factor load and public factor variance of shrub root morphological traits at 30 slope under light rain.

| Research indicators     | Principal component |        | communality |
|-------------------------|---------------------|--------|-------------|
|                         | 1                   | 2      |             |
| Root biomass            | 0.434               | 0.898  | 0.994       |
| Total root length       | 0.851               | 0.517  | 0.992       |
| Total root volume       | 0.893               | 0.447  | 0.997       |
| Total root surface area | 0.868               | 0.494  | 0.997       |
| Characteristic value    | 3.650               | 0.332  |             |
| Variance %              | 91.238              | 8.294  |             |
| Cumulative variance%    | 91.238              | 99.532 |             |

<https://doi.org/10.1371/journal.pone.0288848.t002>

**Table 3. Principal component rotation factor load and public factor variance of shrub root morphological traits at 60 slope under light rain.**

| Research indicators     | Principal component |        | communality |
|-------------------------|---------------------|--------|-------------|
|                         | 1                   | 2      |             |
| Root biomass            | 0.549               | 0.828  | 0.997       |
| Total root length       | 0.801               | 0.589  | 0.985       |
| Total root volume       | 0.888               | 0.442  | 0.983       |
| Total root surface area | 0.871               | 0.490  | 0.998       |
| Characteristic value    | 3.763               | 0.193  |             |
| Variance %              | 94.078              | 4.827  |             |
| Cumulative variance%    | 94.078              | 98.906 |             |

<https://doi.org/10.1371/journal.pone.0288848.t003>

**Table 4. Principal component rotation factor load and public factor variance of shrub root morphological traits at 30 slope under heavy rain.**

| Research indicators     | Principal component |        | communality |
|-------------------------|---------------------|--------|-------------|
|                         | 1                   | 2      |             |
| Root biomass            | 0.447               | 0.895  | 0.998       |
| Total root length       | 0.863               | 0.505  | 0.997       |
| Total root volume       | 0.893               | 0.449  | 0.995       |
| Total root surface area | 0.865               | 0.501  | 0.992       |
| Characteristic value    | 3.669               | 0.329  |             |
| Variance %              | 91.725              | 8.232  |             |
| Cumulative variance%    | 91.725              | 99.957 |             |

<https://doi.org/10.1371/journal.pone.0288848.t004>

**Table 5. Principal component rotation factor load and public factor variance of shrub root morphological traits at 60 slope under heavy rain.**

| Research indicators     | Principal component |        | communality |
|-------------------------|---------------------|--------|-------------|
|                         | 1                   | 2      |             |
| Root biomass            | 0.109               | 0.986  | 0.983       |
| Total root length       | 0.974               | 0.205  | 0.990       |
| Total root volume       | 0.962               | 0.173  | 0.955       |
| Total root surface area | 0.987               | 0.162  | 0.997       |
| Characteristic value    | 3.070               | 0.858  |             |
| Variance %              | 76.742              | 21.461 |             |
| Cumulative variance%    | 76.742              | 98.203 |             |

<https://doi.org/10.1371/journal.pone.0288848.t005>

non-cultivated soil were mainly affected by slope [27]. Previous studies found that the relationship between scour load and slope were significant [28, 29].

In this study, the soil anti-scouring resistance index under heavy rain was significantly lower than that under light rain. This indicated that the rainfall was an important factor affecting soil anti-scouring resistance index. This was consistent with previous studies. Previous studies found that with the rainfall increased, the soil anti-scouring resistance index gradually decreased [30]. Ziadat and Taimeh (2013) also found significant effects of rainfall on soil anti-scouring resistance [27]. Zeng found that rainfall was inversely proportional to soil anti-scouring resistance [31]. The reason for this result might be that rainfall and duration were important factors in controlling soil erosion rates [32–34]. In a certain slope range, with the increase of rainfall, the slope runoff rate increased, so that the erosion force of the slope runoff increased, which leads to the mechanical damage capacity and soil handling capacity of the ground runoff produced by rainfall, so the soil erosion amount increased [35].

## 5.2. Relationship between soil anti-scouring resistance index and root biomass

In this study, under the two conditions of light rain and heavy rain, there was a positive correlation between soil anti-scouring resistance index and root biomass with slopes of both 30° and 60°. This was consistent with previous studies [36]. With the increase of plant root biomass, the soil anti-scouring resistance of slope increased [37]. The reason for this result was that when the shrub root biomass was small, it was difficult to form a larger network structure, so the root was not easy to enhance the impact anti-scouring resistance effect of the root-soil complex [38]. The biomass can increase the soil fixation capacity, and the fine roots existing in the soil layer can aggregate the soil, increase the soil anti-scouring resistance, and reduce the soil scour caused by surface runoff [39].

In this study, under the same biomass conditions, AFL had the largest soil anti-scouring resistance index, followed by SAO and finally LBT. This might be due to the differences in the root distribution and morphology of the shrubs. SAO had no obvious taproots, and more fine roots [18]. LBT had obvious taproots and fewer lateral roots, the root mean diameter was smaller than AFL, and fewer fine roots than AFL. The taproot of AFL had a large number of lateral roots, and the taproot and lateral root interlaced, which can very effectively wrap the soil, forming the soil form with strong anti-scouring resistance, thus playing a better soil consolidation enhancement effect. However, increasing planting density can enhance soil reinforcement, but it can also increase soil infiltration under rainfall, which is not beneficial for soil stability [63]. When the root content is small, the porosity of the soil layer can be increased by increasing the plant root density, thus increasing the permeability coefficient of the soil. However, when the plant root density is increased to a certain value, the permeability of the soil layer will also be reduced to a certain extent because the plant root will gradually cover the previously dispersed and compacted soil layer. The formation of plant roots generally increases the content of water stable aggregates, increases the porosity of the soil layer, and thus increases the soil permeability coefficient. Therefore, the enhancement of plant roots increases the permeability of soil, thus improving the anti-scourability of soil, and achieving the effect of restraining surface runoff.

## 5.3. Relationship between soil anti-scouring resistance index and root morphological traits

TRL, TRV, and TRSA area reflected the distribution characteristics of plant roots in soil [40]. It was closely related to the soil anti-scouring resistance [41, 42]. Therefore, by studying the morphological traits of plant roots, we can evaluate the ability of the roots for soil consolidation [43]. In this study, under the two conditions of light rain and heavy rain, there was a positive correlation between soil anti-scouring resistance index and total root length, total root volume, and total root surface area with slopes of both 30° and 60°. This indicated that the root morphology traits influence the soil anti-scouring resistance index. This was consistent with previous studies [44]. Previous studies found that the morphology of the plant roots was related to the soil anti-scouring resistance [44]. Some scholars found that TRL, TRV, and TRSA were positively correlated with the soil anti-scouring resistance index [18]. The reason for this result might be that the root length, volume, and surface area of the root system directly affected the size of the root-soil contact area and the friction between the root and soil [45, 46]. It was also reported that with the increase of TRL, TRV, and TRSA, root secretion increased, soil cohesion increased, and soil anti-scouring ability to resist ground runoff increased [47].

This study found that under the same root morphological traits, AFL had the largest soil anti-scouring resistance index followed by SAO and finally LBT. The reason for this result might be different root architectural traits in different plants [48]. Previous studies found that under the condition of similar root morphology traits, root architectural traits had a great impact on the enhancement of soil consolidation [49]. The root branch density can especially increase the soil anti-scouring resistance of the root-soil complex [50, 51]. SAO had a relatively high branching density of roots in high-order roots, but a relatively low branching density of roots in low-order roots [52]. AFL had a relatively high branching density of roots in both high and low-order roots with a relatively large branching angle of roots [52]. In conclusion, the soil anti-scouring resistance index of AFL was largest with the same TRL, TRV, and TRSA.

#### 5.4. Main factors affecting the soil anti-scouring resistance index

In this study, under the two conditions of light rain and heavy rain, root morphological traits played a key role on soil anti-scouring resistance with slopes of both 30° and 60°. This was in agreement with previous studies. Soil anti-scouring resistance was the ability of the soil to resist the mechanical damage of ground runoff [53], which was closely related to plant root morphological traits [50, 51]. Previous studies indicated that the reinforcement of soil by plant roots mainly depended on several variables such as root system morphology and mechanical architectures [54, 55]. Root morphological traits can significantly change the distribution of stresses and plastic strains within the soil medium as well as affect the resistance to scouring [56]. Different root morphological traits had effects on the structure of the root-soil complex, causing the difference in the soil anti-scouring resistance [57]. Root morphological traits directly reflected the ability of roots to absorb nutrients and water, which clearly affected soil porosity and increased the resistance to erosion [58]. In quantifications of the effects of roots on runoff and soil loss, the distribution density of root systems often acted as a major indicator, including TRL, TRV, and TRSA [59–63].

## 6. Conclusions

In this study, we selected three shrubs with similar life types under two slopes and two rainfall conditions to reveal the relationship between soil anti-scouring resistance and root biomass and root morphological traits. Through this study, the following conclusions are observed from the study.

- a. Under two slopes and two rainfalls conditions, the soil anti-scouring resistance index of three shrubs varied significantly. For individual plants, SAO had the highest soil anti-scouring resistance index. These results indicated that anti-scouring resistance of SAO was best in the case of individual plants.
- b. Under two slopes and two rainfalls conditions, AFL had the highest soil anti-scouring resistance index when root biomass and root morphological traits were identical. These results indicated that AFL exhibited the best anti-scouring resistance when the root biomass and root morphological traits were the same. Therefore, in the engineering practice, the soil anti-scouring resistance can be increased by selecting the planting AFL.
- c. Under two slopes and two rainfalls conditions, RB and root morphological traits of three shrubs were significantly correlated with the soil anti-scouring resistance index. Therefore, we can use RB, TRL, TRV, and TRSA to reveal the action mechanism of shrub root on soil anti-scouring resistance.

- d. Under two slopes and two rainfalls conditions, according to the composition characteristic values and the contribution rate, the three-shrub root morphological factors have high contribution rate. Therefore, the root morphological factor was the key factor affecting the soil anti-scouring resistance. These results indicated that TRL, TRV, and TRSA played an important role in the enhancement effect of soil anti-scouring resistance.

## Supporting information

**S1 File.**

(DOCX)

**S1 Data.**

(XLSX)

**S2 Data.**

(XLSX)

**S3 Data.**

(XLSX)

**S4 Data.**

(XLSX)

## Acknowledgments

This research was supported by grants from the National Natural Science Foundation of China (42230703, 41773075).

## Author Contributions

**Conceptualization:** Yibo Li.

**Data curation:** Guoyong Yan.

**Formal analysis:** Guoyong Yan, Qinggui Wang.

**Funding acquisition:** Guoyong Yan.

**Investigation:** Guoyong Yan.

**Methodology:** Guoyong Yan.

**Project administration:** Guoyong Yan.

**Resources:** Guoyong Yan.

**Software:** Mingxin Zhou, Guoyong Yan.

**Validation:** Mingxin Zhou, Yajuan Xing.

**Visualization:** Guoyong Yan.

**Writing – original draft:** Mingxin Zhou, Guoyong Yan, Qinggui Wang, Yajuan Xing.

**Writing – review & editing:** Mingxin Zhou, Guoyong Yan, Yibo Li, Di Chen, Chao Yan, Nan Wang, Chao Jia, Qinggui Wang, Yajuan Xing.

## References

1. Mouzai L., Bouhadef M. Water drop erosivity: effects on soil splash. *J. Hydraul. Res* 2003, 41, 61–68.
2. Chaplot V. A. M., Le B. Y. Field measurements of interrill erosion under different slopes and plot sizes. *Earth Surf. Process. Landf* 2000, 25, 145–153.
3. Su L. J., Hu B., Xie Q. J. Experimental and theoretical study of mechanical properties of root-soil interface for slope protection;. *J. Mt. Sci.* 2020, 17, 2784–2795.
4. Wang Y., Liu X., Zhang Z. Analysis on slope stability considering seepage effect on effective stress. *KSCCE Journal of Civil Engineering* 2016, 20, 2235–2242.
5. Lee D. H., Yang Y. E., Lin H. M. Assessing slope protection methods for weak rock slopes in Southwestern Taiwan. *Engineering Geology* 2007, 91, 100–116.
6. Loch R. Effects of vegetation cover on runoff and erosion under simulated rain and overland flow on a rehabilitated site on the Meandu Mine, Tarong, Queensland. *Soil Res* 2000, 38, 299–312.
7. Zhou Z., Shangguan Z. Soil anti-scourability during the vegetation succession in Ziwuling secondary forest. *Acta Ecol Sin* 2016, 26, 3270–3275.
8. Ji X. D., Xu C., Dai X. Q. Studying the mechanical properties of the soil-root interface using the pullout test method. *Journal of Mountain Science* 2018, 15, 882–893.
9. Norris J. E., Stokes A., Mickovski S. B. Slope stability and erosion control: ecotechnological solutions. Springer, Dordrecht 2008, 12, 112–125.
10. Imeson A. C., Prinsen H. A. Vegetation patterns as biological indicators for identifying runoff and sediment source and sink areas for semi-arid landscapes in Spain. *Agriculture Ecosystems & Environment* 2004, 104, 333–342.
11. Olabisi L. S. Uncovering the root causes of soil erosion in the Philippines. *Soc Nat Resour* 2012, 25,37–51.
12. Abdi E., Majnounian B., Genet M. Quantifying the effects of root reinforcement of Persian Ironwood (*Parrotia persica*) on slope stability; a case study: hillslope of Hyrcanian forests. *Ecological Engineering* 2010, 36, 1409–1416.
13. Hui-fang J., Dongmei S., Dongmei Z., Xiaoying W., Sanshu D., Teng L. Mechanisms of root-soil reinforcement in bioembankments of sloping farmland in the purple hilly area, China. *J. Mt. Sci.* 2019, 16, 2285–2298.
14. Shiels A. B., West C. A., Weiss L. Soil factors predict initial plant colonization on Puerto Rican landslides. *Plant Ecology* 2008, 195, 165–178.
15. Zhang G. S., Chan K. Y., Oates A. Relationship between soil structure and runoff soil loss after 24 years of conservation tillage. *Soil Tillage Res* 2007, 92, 122–128.
16. Niu X. L., Nan Z. B. Roots of *Cleistogenes songorica* Improved Soil Aggregate Cohesion and Enhance Soil Water Erosion Resistance in Rainfall Simulation Experiments. *Water Air Soil Pollut* 2017, 228, 109.
17. Li Y., Zhou M., Zuo H., Wang Q., Xing Y., Yan G. Root System Traits and Mechanical Properties of Three Shrub Species: Implications for the Structural Stability of the Ecological Slope. *International Journal of Engineering* 2022, 35, 291–299.
18. GuanHua Z., GuoBin L., PingCang Z., Liang Y. Influence of vegetation parameters on runoff and sediment characteristics in patterned *Artemisia capillaris* plots. *Journal of Arid Land* 2014, 6, 352–360.
19. Bordoni M., Cislighi A., Vercesi A., Bischetti G.B., Meisina C. Effects of plant roots on soil shear strength and shallow landslide proneness in an area of northern Italian Apennines. *Bull. Eng. Geol. Environ* 2020, 79, 3361.
20. Cohen D., Schwarz M. Tree-root control of shallow landslides. *Earth Surface Dynamics* 2017, 5, 451.
21. Gysels G., Poesen J., Bochet E. Impact of plant roots on the resistance of soils to erosion by water: a review. *Progress in Physical Geography* 2005, 29, 189–217.
22. Roose T., Keyes S. D., Daly K. R. Challenges in imaging and predictive modeling of rhizosphere processes. *Plant and Soil* 2016, 407, 9.
23. Balzano B., Tarantino A., Ridley A. Preliminary analysis on the impacts of the rhizosphere on occurrence of rainfall-induced shallow landslides. *Landslides* 2019, 16, 1885.
24. Qiang L., Guobin L., Zheng Z., Dengfeng T., Mingxiang X. Effect of Root Architecture on Structural Stability and Erodibility of Topsoils during Concentrated Flow in Hilly Loess Plateau. *Chinese Geographical Science* 2015, 25, 757–764.
25. Fu S., Liu B., Liu H. The effect of slope on interrill erosion at short slopes. *Catena* 2011, 84, 29–34.
26. VanDijk A. I., J M., Bruijnzeel M., Eisma E. H. A methodology to study rain splash and wash processes under natural rainfall. *Hydrological Processes* 2003, 17, 153–167.

27. Ziadat F. M., Taimeh A. Y. Effect of rainfall intensity, slope and land use and antecedent soil moisture on soil erosion in an arid environment. *Land Degradation & Development* 2013, 24, 582–590.
28. Liu B. Y., Nearing M. A., Risse L. M. Slope gradient effects on soil loss for steep slopes. *Transactions of the ASAE* 1994, 37, 1835–1840.
29. Sirjani E., Mahmoodabadi M. Effects of sheet flow rate and slope gradient on sediment load. *Arabian Journal of Geosciences* 2012, 7, 203–210.
30. Zhou Z. C., Shangguan Z. P. The effects of ryegrass roots and shoots on loess erosion under simulated rainfall. *Catena* 2007, 70, 350–355.
31. Jianbo L., Guangyao G., Shuai W., Lei J1., Xing W., Bojie F. The effects of vegetation on runoff and soil loss: Multidimensional structure analysis and scale characteristics. *Journal of Geographical Sciences* 2018, 28, 59–78.
32. González-Hidalgo J. C., Batalla R. J., Cerdà A. Contribution of the largest events to suspended sediment transport across the USA. *Land Degradation & Development* 2010, 21, 83–91.
33. González-Hidalgo J. C., Batalla R. J., Cerdà A. A regional analysis of the effects of largest events on soil erosion. *Catena* 2012, 95, 85–90.
34. LópezMoreno J. I., Beguería S., Sanjuan Y. An exceptional rainfall event in the central western Pyrenees: spatial patterns in discharge and impact. *Land Degradation & Development* 2015, 26, 249–262.
35. Grismer M. Standards vary in studies using rainfall simulators to evaluate erosion. *California Agriculture* 2012, 66, 102–107.
36. Fitter A. H., Stickland T. R. Architectural analysis of plant root systems III: Studies on plants under field conditions. *New Phytologist* 1992, 121, 243.
37. Fitter A. H., Graves J. D., Wolfenden J., Self G. K., Brown T. K., Bogie D., et al. Root production and turnover and carbon budgets of two contrasting grasslands under ambient and elevated atmospheric carbon dioxide concentrations. *New Phytologist* 1997, 137, 247. <https://doi.org/10.1046/j.1469-8137.1997.00804.x> PMID: 33863180
38. Wenxiu X., Ling Y., Yu-hai BAO., Jin-lin, L., Jie, W. Soil anti-scourability enhanced by herbaceous species roots in a reservoir water level fluctuation zone. *Journal of Mountain Science* 2021, 18, 392–406.
39. Zhao G., Mu X., Wen Z. Soil erosion, conservation, and ecoenvironment changes in the Loess Plateau of China. *Land Degradation & Development* 2013, 24, 499–510. <https://doi.org/10.1002/ldr.2246>
40. Maetei S. J. Mechanics of landslide initiation as a shear feature phenomenon. *Marine Geology* 2004, 203, 319–339.
41. Fattet M., Fu Y., Ghestem M. Effects of vegetation type on soil resistance to erosion: relationship between aggregate stability and shear strength. *Catena* 2011, 87, 60–69.
42. Stokes A., Atger C., Bengough A. G., Fourcaud T., Sidle R.C., “Desirable plant root traits for protecting natural and engineered slopes against landslides”, *Plant and Soil* 2009, 324, 1–30.
43. Sonnenberg R., Bransby M. F., Hallett P. D. Centrifuge modeling of soil slopes reinforced with vegetation. *Canadian Geotechnical Journal* 2010, 47, 1415–1430.
44. Shiels A. B., West C. A., Weiss L. Soil factors predict initial plant colonization on Puerto Rican landslides. *Plant Ecology* 2008, 195, 165–178.
45. Braud I., Vich A. I. J., Zuluaga J. Vegetation influence on runoff and sediment yield in the Andes region: observation and modeling. *Journal of Hydrology* 2001, 254, 124–144.
46. Czarnes S., Hallett P. D., Bengough A. G. Root-and microbial-derived mucilages affect soil structure and water transport. *European Journal of soil Science* 2000, 51, 435–443.
47. Danjon F., Reubens B. Assessing and analyzing 3D architecture of woody root systems, a review of methods and applications in tree and soil stability, resource acquisition and allocation. *Plant and Soil* 2008, 303, 1–34.
48. Ghestem M., Veylon G., Bernard A. Influence of plant root system morphology and architectural traits on soil shear resistance. *Plant and Soil* 2014, 377, 43.
49. Abe K., Ziemer R. R. Effect of tree roots on a shear zone: modeling reinforced shear stress. *Canadian Journal of Forest Research* 1991, 21, 1012–1019.
50. Mickovski S. B., Bengough A. G., Bransby M. F. Material stiffness, branching pattern and soil matrix potential affect the pullout resistance of model root systems. *European Journal of Soil Science* 2007, 58, 1471–1481.
51. Yibo L., Mingxin Z., Hongliang Z., Qinggui W., Yajuan X., Guoyong Y. Root Traits and Mechanical Properties of Three Shrubland Species: Implications for Bioengineered Slope Stability. *Environmental Engineering Science* 2021, 38, 1176–1187.

52. Vannoppen W., Vanmaercke M., De, Baets S. A review of the mechanical effects of plant roots on concentrated flow erosion rates. *Earth Science Reviews* 2015, 150, 666–678.
53. Gyssels G., Poesen J., Bochet E. The importance of plant root characteristics in controlling concentrated flow erosion rates. *Earth Surface Process Landforms* 2003, 28, 371–384.
54. Glab T., Kacorzyk P. Root distribution and herbage production under different management regimes of mountain grassland. *Soil Tillage Research* 2011, 113, 99–104.
55. De, Baets S, Poesen J., Gyssels G. Effects of grass roots on the erodibility of topsoils during concentrated flow. *Geomorphology* 2006, 76, 54–67.
56. Wu W. D., Zheng S. Z., Lu Z.H. Effect of plant roots on penetrability and anti-scourability of red soil derived from granite. *Pedosphere* 2000, 10, 183–188.
57. Sharanya A. G., Heeralal M., Thyagaraj T. Soil Shrinkage Characterization of Low Plasticity Soil using Digital Image Analysis Process. *International Journal of Engineering, Transactions A: Basics* 2021, 34 (10), 2206–2212.
58. Burylo M., Rey F., Mathys N. Plant root traits affecting the resistance of soils to concentrated flow erosion. *Earth Surface Processes & Landforms* 2012, 37, 1436–1470.
59. Reubens B., Poesen J., Frédéric Danjon. The role of fine and coarse roots in shallow slope stability and soil erosion control with a focus on root system architecture: a review. *Trees-Structure and Function* 2007, 21, 385–402.
60. Ng C. W. W., Zhang Q., Zhou C., & Ni J. Eco-geotechnics for human sustainability. *Science China Technological Sciences* 2022, 65(12), 2809–2845.
61. Wang X., Ma C., Wang Y., Wang Y., Li T., Dai Z., et al. Effect of root architecture on rainfall threshold for slope stability: variabilities in saturated hydraulic conductivity and strength of root-soil composite. *Landslides* 2020, 17, 1965–1977.
62. Ni J. J., Leung A. K., Ng C. W. W., & Shao W. Modelling hydro-mechanical reinforcements of plants to slope stability. *Computers and Geotechnics* 2018, 95, 99–109.
63. Ng C. W. W., Ni J. J., Leung A. K., Zhou C., & Wang Z. J. Effects of planting density on tree growth and induced soil suction. *Géotechnique* 2016, 66(9), 711–724.
